# Supplementary material
Source: MDPI journal article supplement (https://www.mdpi.com/2071-1050/15/12/9199)
Supplement: s1 [file s1]

## **SUPPLEMENTARY MATERIAL**

### **Screening of commonly used antibiotics in fresh and saltwater samples impacted by aquacultures: analytical methodology, occurrence and environmental risk assessment**

**Vasiliki Boti<sup>1,2,3\*</sup>, Vasiliki Toli<sup>1</sup>, Christina Efthymiou<sup>1</sup> and Triantafyllos Albanis<sup>1,2,3</sup>**

<sup>1</sup>Department of Chemistry, University of Ioannina, Ioannina, 45110, Greece

<sup>2</sup>Institute of Environment and Sustainable Development, University Research Center of Ioannina (URCI), Ioannina, 45110, Greece

<sup>3</sup>Unit of Environmental, Organic and Biochemical high-resolution analysis–Orbitrap-LC–MS, University of Ioannina, Ioannina, 45110, Greece

\*Correspondence: vboti@uoi.gr ; Tel: +302651008319

**Table S1.** List of the surveyed antibiotics with their physicochemical properties and therapeutic use.

| Antibiotic       | Category         | Elemental Formula                                                  | M.W.    | Solubility, S (mg L <sup>-1</sup> , 25 °C) | pK <sub>a</sub> | LogK <sub>ow</sub> | Treatment/ Therapeutic use                                                                                |
|------------------|------------------|--------------------------------------------------------------------|---------|--------------------------------------------|-----------------|--------------------|-----------------------------------------------------------------------------------------------------------|
| Oxytetracycline  | Tetracycline     | C <sub>22</sub> H <sub>24</sub> N <sub>2</sub> O <sub>9</sub>      | 460.148 | 1399                                       | 3.27            | -0.9               | Bacterial infections (Vibrio anguillarum etc.) ( <a href="#">Akiyama et al., 2020</a> )                   |
| Oxolinic acid    | Quinolone        | C <sub>13</sub> H <sub>11</sub> NO <sub>5</sub>                    | 261.230 | 8007                                       | 5.58            | 0.94               | Bacterial infections (Enterobacter, Shigella, Vibrio etc.) ( <a href="#">Touraki et al., 2012</a> )       |
| Erythromycin     | Macrolide        | C <sub>37</sub> H <sub>67</sub> NO <sub>13</sub>                   | 733.461 | 2000                                       | 8.88            | 3.06               | Bacterial infections (Streptococcus, Lactococcus garvieae etc.) ( <a href="#">Di Salvo et al., 2013</a> ) |
| Sulfamethoxazole | Sulfonamide      | C <sub>10</sub> H <sub>11</sub> N <sub>3</sub> O <sub>3</sub> S    | 253.078 | 3942                                       | 1.97 / 6.16     | 0.89               | Bacterial infections (Aeromonas, Pseudomonas etc.) ( <a href="#">Phu et al., 2015</a> )                   |
| Trimethoprim     | Benzylpyrimidine | C <sub>14</sub> H <sub>18</sub> N <sub>4</sub> O <sub>3</sub>      | 290.318 | 2334                                       | 7.12            | 0.91               | Bacterial infections (Aeromonas, Pseudomonas etc.) ( <a href="#">Phu et al., 2015</a> )                   |
| Florfenicol      | Amphenicol       | C <sub>12</sub> H <sub>14</sub> Cl <sub>2</sub> FNO <sub>4</sub> S | 357.000 | 5936                                       | 9.03            | -0.04              | Bacterial infections (Streptococcus, Salmonella etc.) ( <a href="#">Zeng et al., 2019</a> )               |

**Table S2.** Physicochemical properties values of water samples depending on their origin.

| Physicochemical parameters          | Distilled water | River water | Seawater* |
|-------------------------------------|-----------------|-------------|-----------|
| TDS (mg L <sup>-1</sup> )           | 3.00            | 225-10500   | 52400     |
| Conductivity (mS cm <sup>-1</sup> ) | 2.20            | 325-11620   | 51600     |
| Salinity (‰)                        | 0               | 0 -9.5      | 36.8      |
| pH                                  | 7.14            | 6.73*       | 7.81      |

\* Sampling points mean values of the physicochemical parameters.

**Table S3.** Gradient elution programs for positive (PI) and negative ionization (NI).

| Positive          |    |    | Negative          |    |     |
|-------------------|----|----|-------------------|----|-----|
| Time<br>(minutes) | A% | B% | Time<br>(minutes) | A% | B%  |
| 0.00              | 90 | 10 | 0.00              | 90 | 10  |
| 2.00              | 50 | 50 | 1.00              | 90 | 10  |
| 8.00              | 5  | 95 | 9.00              | 0  | 100 |
| 8.10              | 90 | 10 | 9.10              | 90 | 10  |
| 9.00              | 90 | 10 | 10.0              | 90 | 10  |

**Table S4.** Detection parameters for SIM MS/dd-MS<sup>2</sup> analysis of the selected antibiotics.

| Antibiotics          | t <sub>R</sub> (min) | Molecular ion <sup>a</sup>                                                      | Theoretical Mass<br>(m/z) | Mass accuracy<br>(ppm) | Fragment ions <sup>b</sup><br>(m/z) |
|----------------------|----------------------|---------------------------------------------------------------------------------|---------------------------|------------------------|-------------------------------------|
| TMP                  | 2.73                 | C <sub>14</sub> H <sub>19</sub> N <sub>4</sub> O <sub>3</sub> <sup>+</sup>      | 291.1452                  | -1.98                  | 230.1170                            |
| SMX                  | 2.86                 | C <sub>10</sub> H <sub>11</sub> N <sub>3</sub> O <sub>3</sub> S <sup>+</sup>    | 254.0594                  | -1.77                  | 188.0806                            |
| OTC                  | 3.04                 | C <sub>22</sub> H <sub>24</sub> N <sub>2</sub> O <sub>9</sub> <sup>+</sup>      | 461.1555                  | -2.99                  | 443.1448                            |
| OXO                  | 3.98                 | C <sub>13</sub> H <sub>11</sub> NO <sub>5</sub> <sup>+</sup>                    | 262.0710                  | -2.74                  | 244.0613                            |
| ERY-H <sub>2</sub> O | 6.05                 | C <sub>37</sub> H <sub>65</sub> NO <sub>12</sub> <sup>+</sup>                   | 716.4580                  | -1.62                  | 588.3606                            |
| FFC                  | 2.64                 | C <sub>12</sub> H <sub>14</sub> Cl <sub>2</sub> FNO <sub>4</sub> S <sup>-</sup> | 355.9932                  | -0.75                  | 335.9857                            |

<sup>a</sup>Positive ionization for all compounds except FFC for which Negative ionization was applied<sup>b</sup>Normalized Collision Energy CID 35%

**Table S5.** Operational parameters of LTQ- Orbitrap HRMS instrument in positive and negative ionization respectively.

| <b>Parameters</b>     | <b>Positive</b> | <b>Negative</b> |
|-----------------------|-----------------|-----------------|
| Spray voltage         | 3.5V            | 3.5V            |
| Sealth gas            | 30au            | 14au            |
| Auxiliary gas         | 7au             | 12au            |
| Capillary voltage     | 40V             | -35V            |
| Capillary temperature | 330°C           | 330°C           |
| Tube lens voltage     | 110V            | -90V            |
| Resolution            | 60000           | 60000           |

Table S6. Acute and chronic RQ values obtained after the potential risk assessment for each identified antibiotic in river and sea samples “based on the worst-case scenario” at the three trophic levels.

| Antibiotic         | RQ          |             |              |             |          |            |
|--------------------|-------------|-------------|--------------|-------------|----------|------------|
|                    | Fish        |             | Invertebrate |             | Algae    |            |
|                    | acute       | chronic     | acute        | chronic     | acute    | chronic    |
| <b>TMP (river)</b> | 2.69804E-05 | 0.000001000 | 0.000304507  | 8.01282E-06 | 0.000362 | 0.00000200 |
| <b>TMP (sea)</b>   | 0.000175912 | 0.000006520 | 0.001985384  | 5.22436E-05 | 0.002362 | 0.00001304 |
| <b>OTC (river)</b> | 0.005105263 | 0.000000388 | 0.215555556  | 0.002155556 | 0.228235 | 0.01552000 |
| <b>OTC (sea)</b>   | 0.011105263 | 0.000000844 | 0.468888889  | 0.004688889 | 0.496471 | 0.03376000 |
| <b>SMX (sea)</b>   | 4.58043E-05 | 9.38086E-05 | 0.023809524  | 0.000416667 | 0.185185 | 0.00500000 |
| <b>FFC (sea)</b>   | 6.85832E-06 | 4.36364E-06 | 0.000300000  | 3.15789E-05 | 0.001846 | 0.00003200 |

**Table S7.** Acute toxicity data (EC50, mg/L) of antibiotics on fish, invertebrates and algae (**lower values** indicated in bold font)

| Antibiotics | Fish              |                        |                           | Invertebrates |                    |                             | Algae       |                         |                                             |
|-------------|-------------------|------------------------|---------------------------|---------------|--------------------|-----------------------------|-------------|-------------------------|---------------------------------------------|
|             | EC50 (mg/l)       | Test organism          | Reference                 | EC50 (mg/l)   | Test organism      | Reference                   | EC50 (mg/l) | Test organism           | Reference                                   |
| TMP         | 795               | <i>O. latipes</i>      | (Gros et al., 2010)       | 120.7         | <i>D. magna</i>    | (Ginebreda et al., 2010)    | 40          | <i>P.subcapitata</i>    | (Valcárcel et al., 2011)                    |
|             | <b>92.66</b>      | <i>P.reticulata</i>    | (De Liguoro et al., 2012) | 123           | <i>D. magna</i>    | (Grung et al., 2008)        | 80.3 (72h)  | <i>S.capricornutum</i>  | (Eguchi et al., 2004)                       |
|             | >100              | <i>O. latipes</i>      | (Kim et al., 2007)        | <b>8.21</b>   | <i>D. magna</i>    | (De Liguoro et al., 2012)   | 83.8        | <i>P. subcapitata</i>   | (De Liguoro et al., 2012)                   |
|             |                   |                        |                           | 189.5 (24h)*  | <i>B. koreanus</i> | (X. Wang et al., 2022)      | 16 (96h)    |                         | (Ginebreda et al., 2010; Gros et al., 2010) |
|             |                   |                        |                           | >100          | <i>H. vulgaris</i> | (Quinn et al., 2008)        | 11          | <i>A.variabilis</i>     | (Ando et al., 2007)                         |
|             |                   |                        |                           | 92            | <i>D. magna</i>    | (Park & Choi, 2008)         | 90.86       | <i>C. vulgaris</i>      | (Borecka et al., 2016)                      |
|             |                   |                        |                           | 100           | <i>D. magna</i>    | (Kolar et al., 2014)        | <b>6.9</b>  | <i>M. aeruginosa</i>    | (Carvalho & Santos, 2016)                   |
|             |                   |                        |                           |               |                    |                             | 53          | <i>Nostoc sp.</i>       | (Ando et al., 2007)                         |
|             |                   |                        |                           |               |                    |                             | >9          | <i>P. subcapitata</i>   | (Carvalho & Santos, 2016)                   |
| OTC         | 62.5 (24h)        | <i>M. saxatilis</i>    | (Kovalakova et al., 2020) | 40.13         | <i>H.vulgaris</i>  | (Pro et al., 2003)          | 0.32        | <i>A. cylindrica</i>    | (Ando et al., 2007)                         |
|             | 215 (48h)         | <i>O.latipes</i>       | (Park & Choi, 2008)       | 46.2 (48h)    | <i>D. magna</i>    | (Wollenberger et al., 2000) | <b>0.17</b> | <i>S. capricornutum</i> | (Pro et al., 2003)                          |
|             | 110 (96h)         | <i>O. latipes</i>      | (Park & Choi, 2008)       | 22.64 (24h)   | <i>D. magna</i>    | (Isidori et al., 2005)      | 4.5 (72h)   | <i>P. subcapitata</i>   | (Kovalakova et al., 2020)                   |
|             | >200 (24h)        | <i>S. namaycush</i>    | (Park & Choi, 2008)       | 21.8 (48h)    | <i>P.lividus</i>   | (X. Wang et al., 2022)      | 17.25 (96h) | <i>T. suecica</i>       | (X. Wang et al., 2022)                      |
|             | <b>7.6 (48h)*</b> | <i>P.mesopotamicus</i> | (Carraschi et al., 2011)  | >300 (24h)*   | <i>B.koreanus</i>  | (X. Wang et al., 2022)      | 1.73 (96h)  | <i>P.tricornutum</i>    | (X. Wang et al., 2022)                      |
|             | 127.6 (72h)       | <i>D. rerio</i>        | (Oliveira et al., 2013)   | 114           | <i>D. magna</i>    | (Kołodziejska et al., 2013) | 6.43 (96h)  | <i>I. galbana</i>       | (X. Wang et al., 2022)                      |



|     |                     |                        |                          |                |                        |                             |                  |                        |                                |
|-----|---------------------|------------------------|--------------------------|----------------|------------------------|-----------------------------|------------------|------------------------|--------------------------------|
|     | 139.5               | <i>D. rerio</i>        | (Pro et al., 2003)       | >250           | Moina m.               | (Ji et al., 2012)           | 11.18 (96h)      | <i>T. chui</i>         | (X. Wang et al., 2022)         |
|     | 597 (96h)*          | <i>M.saxatilis</i>     | (X. Wang et al., 2022)   | 126.7          | Moina m.               | (Pro et al., 2003)          | 39 (96h)         | <i>T. chui</i>         | (X. Wang et al., 2022)         |
|     |                     |                        |                          | 1.87           | <i>B.calyciflorus</i>  | (Pro et al., 2003)          | 0.23             | <i>M. aeruginosa</i>   | (Ando et al., 2007)            |
|     |                     |                        |                          | <b>0.18</b>    | <i>C. dubia</i>        | (Ji et al., 2012)           | 0.35             | <i>M. wesenbergii</i>  | (Ando et al., 2007)            |
|     |                     |                        |                          | 7.4            | <i>D. magna</i>        | (Ji et al., 2012)           | 0.6              | <i>P. subcapitata</i>  | (Q. Li et al., 2020)           |
|     |                     |                        |                          | 25 (24h)*      | <i>T. platyurus</i>    | (Ji et al., 2012)           | 0.92             | <i>P. subcapitata</i>  | (Magdaleno et al., 2017)       |
|     |                     |                        |                          |                |                        |                             | 0.342 (72h)      | <i>P. subcapitata</i>  | (Kovalakova et al., 2020)      |
| FFL | >1000 (48h)*        | <i>P.mesopotamicus</i> | (Carraschi et al., 2011) | 337            | <i>D. magna</i>        | (Kołodziejska et al., 2013) | 9.03 (96h)*      | <i>T. suecica</i>      | (X. Wang et al., 2022)         |
|     | >780 (48h)*         | <i>O. mykiss</i>       | (Carraschi et al., 2011) | <b>8 (96h)</b> | <i>I. galbana</i>      | (X. Wang et al., 2022)      | 215 (96h)        | <i>C. pyrenoidosa</i>  | (Q. Li et al., 2020)           |
|     | >830 (48 h)*        | <i>L. macrochirus</i>  | (Carraschi et al., 2011) | >64            | <i>L.vannamei</i>      | (X. Wang et al., 2022)      | <b>1.3 (96h)</b> | <i>T. chui</i>         | (X. Wang et al., 2022)         |
|     | <b>349.94 (96h)</b> | <i>O. niloticus</i>    | (Mattioli et al., 2020)  |                |                        |                             | 9.4              | <i>C.pyrenoidosa</i>   | (Q. Li et al., 2020)           |
|     |                     |                        |                          |                |                        |                             | 14.25            | <i>C. pyenoidosa</i>   | (Z. Wang et al., 2016)         |
|     |                     |                        |                          |                |                        |                             | 18               | <i>C. fusca</i>        | (Q. Li et al., 2020)           |
|     |                     |                        |                          |                |                        |                             | 2.3              | <i>P. subcapitata</i>  | (Q. Li et al., 2020)           |
|     |                     |                        |                          |                |                        |                             | 11.18 (96h)      | <i>T. chuii</i>        | (Ferreira et al., 2007)        |
| SMX | 562.5               | <i>O. latipes</i>      | (Gros et al., 2010)      | 25.2           | <i>D. magna</i>        | (Gros et al., 2010)         | <b>0.027</b>     | <i>S. leopoliensis</i> | (Gros et al., 2010)            |
|     | >750 (48h)          | <i>O. latipes</i>      | (Kim et al., 2007)       | 26             | <i>B. calyciflorus</i> | (Grung et al., 2008)        | 0.146            | <i>P. subcapitata</i>  | (Grung et al., 2008)           |
|     | <b>109.16</b>       | <i>D. rerio</i>        | (L. Li et al., 2019)     | 15.5           | <i>C. dubia</i>        | (Grung et al., 2008)        | 2.4              | <i>C. meneghiniana</i> | (Grung et al., 2008)           |
|     |                     |                        |                          | 9.63           | <i>B.calyciflorus</i>  | (Grung et al., 2008)        | 0.57             | <i>P. subcapitata</i>  | (Grung et al., 2008)           |
|     |                     |                        |                          | 177.3          | <i>D. magna</i>        | (Q. Li et al., 2020)        | 0.03 (96h)       | <i>S. leopolensis</i>  | (W. Li et al., 2012)           |
|     |                     |                        |                          | 15.51 (48 h)   | <i>C. dubia</i>        | (W. Li et al., 2012)        | 1.54             | <i>S. Vacuolatus</i>   | (Białk-Bielińska et al., 2011) |

---

|                 |            |                             |       |                       |                                |
|-----------------|------------|-----------------------------|-------|-----------------------|--------------------------------|
| 276.1<br>(24h)* | B.koreanus | (X. Wang et al., 2022)      | 0.146 | <i>P. subcapitata</i> | (Ferrari et al., 2004)         |
| <b>0.21</b>     | C.dubia    | (Isidori et al., 2005)      | 1.54  | <i>S. vacuolatus</i>  | (Białk-Bielińska et al., 2011) |
| 75.3            | D. magna   | (Osorio et al., 2016)       | 0.98  | <i>C. vulgaris</i>    | (Borecka et al., 2016)         |
| 3.3             | D. magna   | (Q. Li et al., 2020)        | 0.55  | <i>M. aeruginosa</i>  | (Q. Li et al., 2020)           |
| 7.2 (96h)       | D. magna   | (Yazdanbakhsh et al., 2020) | 0.268 | <i>S.leopolensis</i>  | (Q. Li et al., 2020)           |
| 1.29            | D.magna    | (L. Li et al., 2019)        | 0.12  | <i>S.obliquus</i>     | (Q. Li et al., 2020)           |

---

\* indicates LC50 (mg/L) value

**Table S8.** Chronic toxicity data (NOEC, mg/L) of antibiotics on fish, invertebrates and algae (**lower values** indicated in bold font)

| Compound | Fish        |                      |                                             | Invertebrates |                            |                             | Algae       |                                               |                                               |
|----------|-------------|----------------------|---------------------------------------------|---------------|----------------------------|-----------------------------|-------------|-----------------------------------------------|-----------------------------------------------|
|          | NOEC (mg/L) | Test organism        | Reference                                   | NOEC (mg/L)   | Test organism              | Reference                   | NOEC (mg/L) | Test organism                                 | Reference                                     |
| TMP      | 25          | <i>P. reticulata</i> | (De Liguoro et al., 2012)                   | 3.12          | <i>D. magna</i>            | (De Liguoro et al., 2012)   | 12.5        | <i>P. subcapitata</i>                         | (De Liguoro et al., 2012)                     |
|          |             |                      |                                             | 6             | <i>D. magna</i>            | (Park & Choi, 2008)         | 25.5        | <i>S. capricornutum</i>                       | (Eguchi et al., 2004)                         |
|          |             |                      |                                             | 124.4         | <i>Brachionus koreanus</i> | (X. Wang et al., 2022)      |             |                                               |                                               |
|          |             |                      |                                             | 20 (21 days)* | <i>D. magna</i>            | (Kovalakova et al., 2020)   |             |                                               |                                               |
| SMX      | >8          | <i>D. rerio</i>      | (Ferrari et al., 2004; Straub et al., 2016) | 25            | <i>B. calyciflorus</i>     | (Ferrari et al., 2004)      | 0.09        | <i>P. subcapitata</i> / <i>S. leopolensis</i> | (Ferrari et al., 2004), (Straub et al., 2016) |
|          | 0.533       | <i>D. rerio</i>      | (L. Li et al., 2019)                        | 0.25          | <i>C. dubia</i>            | (Ferrari et al., 2004)      | 1.25        | <i>C. meneghiniana</i>                        | (Ferrari et al., 2004)                        |
|          |             |                      |                                             | 0.21*         | <i>C. dubia</i>            | (Grung et al., 2008)        | 0.01        | <i>L. gibba</i>                               | (Grung et al., 2008)                          |
|          |             |                      |                                             | 9.63          | <i>B. calyciflorus</i>     | (Isidori et al., 2005)      | 0.0059      | <i>S. leopolensis</i>                         | (Ferrari et al., 2004)                        |
|          |             |                      |                                             | 197.5         | <i>B. koreanus</i>         | (X. Wang et al., 2022)      | 0.5         | <i>P. subcapitata</i>                         | (Nie et al., 2013)                            |
|          |             |                      |                                             | 0.12          | <i>D. magna</i>            | (Lu et al., 2013)           | 0.52        | <i>P. subcapitata</i>                         | (Isidori et al., 2005)                        |
|          |             |                      |                                             | 5             | <i>H. vulgaris</i>         | (Quinn et al., 2008)        |             |                                               |                                               |
| OTC      | 1000        | <i>D. rerio</i>      | (Isidori et al., 2005)                      | 100*          | <i>Daphnia spp.</i>        | (Wollenberger et al., 2000) | 0.1         | <i>P. tricornutum</i>                         | (X. Wang et al., 2022)                        |
|          |             |                      |                                             | 0.18          | <i>D. dubia</i>            | (Isidori et al., 2005)      | 0.183 (72h) | <i>P. subcapitata</i>                         | (Ji et al., 2012)                             |

|     |       |                     |                         |                        |                        |                         |                       |                           |                         |
|-----|-------|---------------------|-------------------------|------------------------|------------------------|-------------------------|-----------------------|---------------------------|-------------------------|
|     |       |                     | 27.7                    | <i>M. macrocopa</i>    | (Ji et al., 2012)      | 0.05*                   | <i>I. galbana</i>     | (X. Wang et al., 2022)    |                         |
|     |       |                     | 50                      | <i>H.attenuata</i>     | (Quinn et al., 2008)   | 3.5 (72h)               | <i>C. vulgaris</i>    | (Kovalakova et al., 2020) |                         |
|     |       |                     | 1.87                    | <i>B. calyciflorus</i> | (Isidori et al., 2005) | 0.17                    | <i>P. subcapitata</i> | (Isidori et al., 2005)    |                         |
|     |       |                     | 0.3                     | <i>C. silvestrii</i>   | (Freitas et al., 2018) | 0.25                    | <i>M. wesenbergii</i> | (Ando et al., 2007)       |                         |
|     |       |                     |                         |                        |                        | 0.031<br>(144h)         | <i>M.aeruginosa</i>   | (Ando et al., 2007)       |                         |
|     |       |                     |                         |                        |                        | <b>0.025</b><br>(144h)  | <i>Anabeana sp.</i>   | (Ando et al., 2007)       |                         |
| FFL | 34.99 | <i>O. niloticus</i> | (Mattioli et al., 2020) | 1.5                    | <i>D. magna</i>        | (Staveley et al., 2013) | <b>0.75 (96 h)</b>    | <i>P. subcapitata</i>     | (Staveley et al., 2013) |
|     | 5.5   | <i>P. promelas</i>  | (Staveley et al., 2013) | 0.76                   | <i>B. calyciflorus</i> | (Staveley et al., 2013) | 3                     | <i>T. chuii</i>           | (Ferreira et al., 2007) |
|     |       |                     |                         | 25                     | <i>C. riparius</i>     | (Staveley et al., 2013) |                       |                           |                         |
|     |       |                     |                         | <b>0.27</b>            | <i>C.silvestrii</i>    | (Freitas et al., 2018)  |                       |                           |                         |
|     |       |                     |                         | 7.6                    | <i>D. magna</i>        | (Martins et al., 2013)  |                       |                           |                         |

\* indicates LOEC (mg/L) value

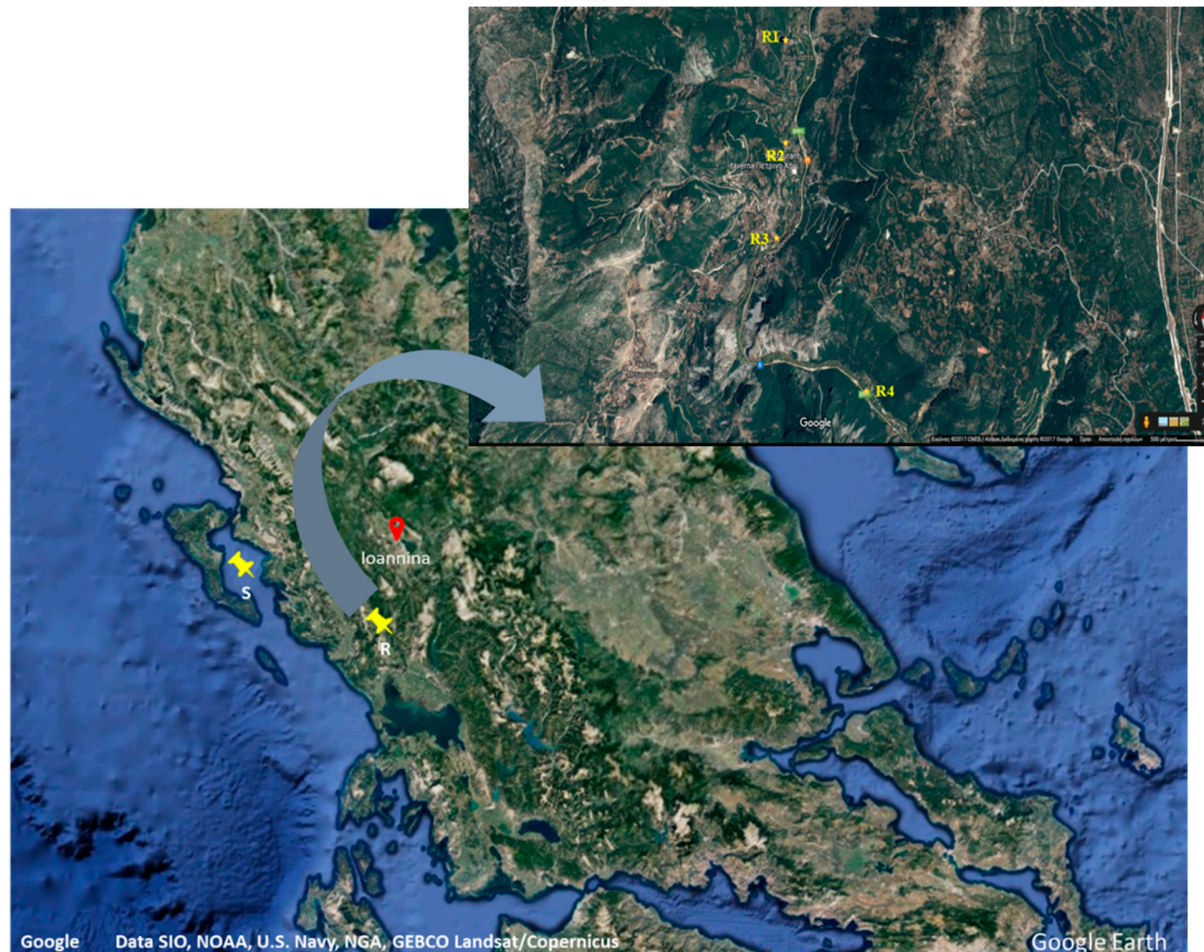

Figure S1. Sampling locations in N.W. Greece (S refers to saltwater sampling points and R to the river ones; R1 to R4 sampling points are shown in the enlarged map area of Louros river, sampling point R5 that is the river estuary lies southern of R4 and it is not included in the map).

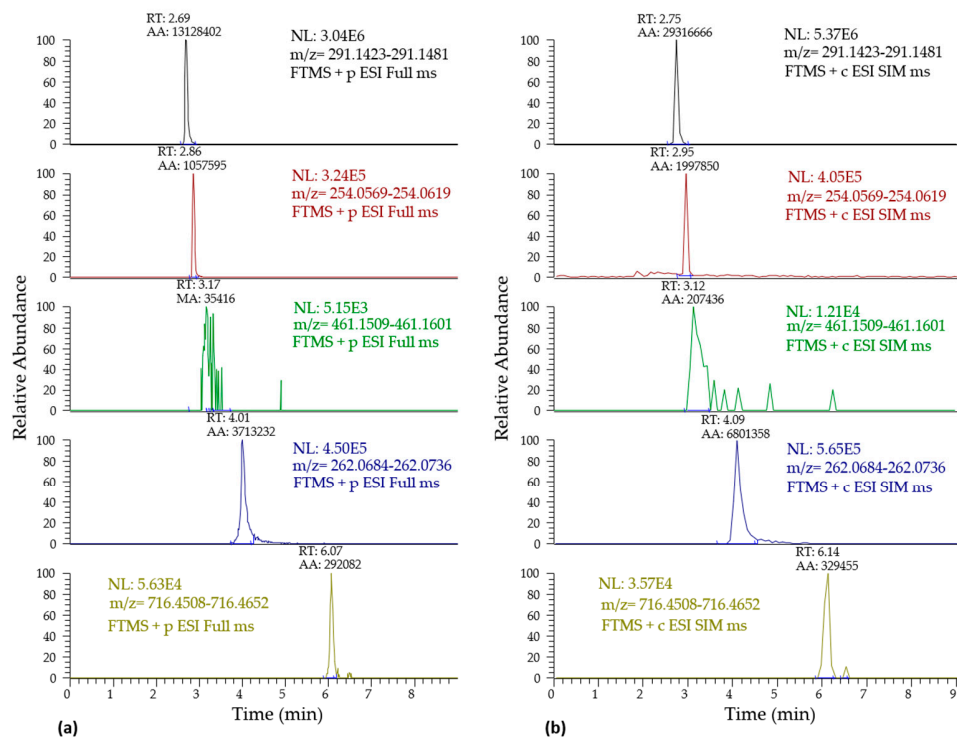

**Figure S2.** Comparative depiction of the SIM - LC-LTQ/Orbitrap MS chromatograms of the selected antibiotics in positive ionization at concentration  $50 \mu\text{g L}^{-1}$  with: (a) full scan acquisition mode and (b) time-scheduled SIM acquisition mode (all other parameters were the same).

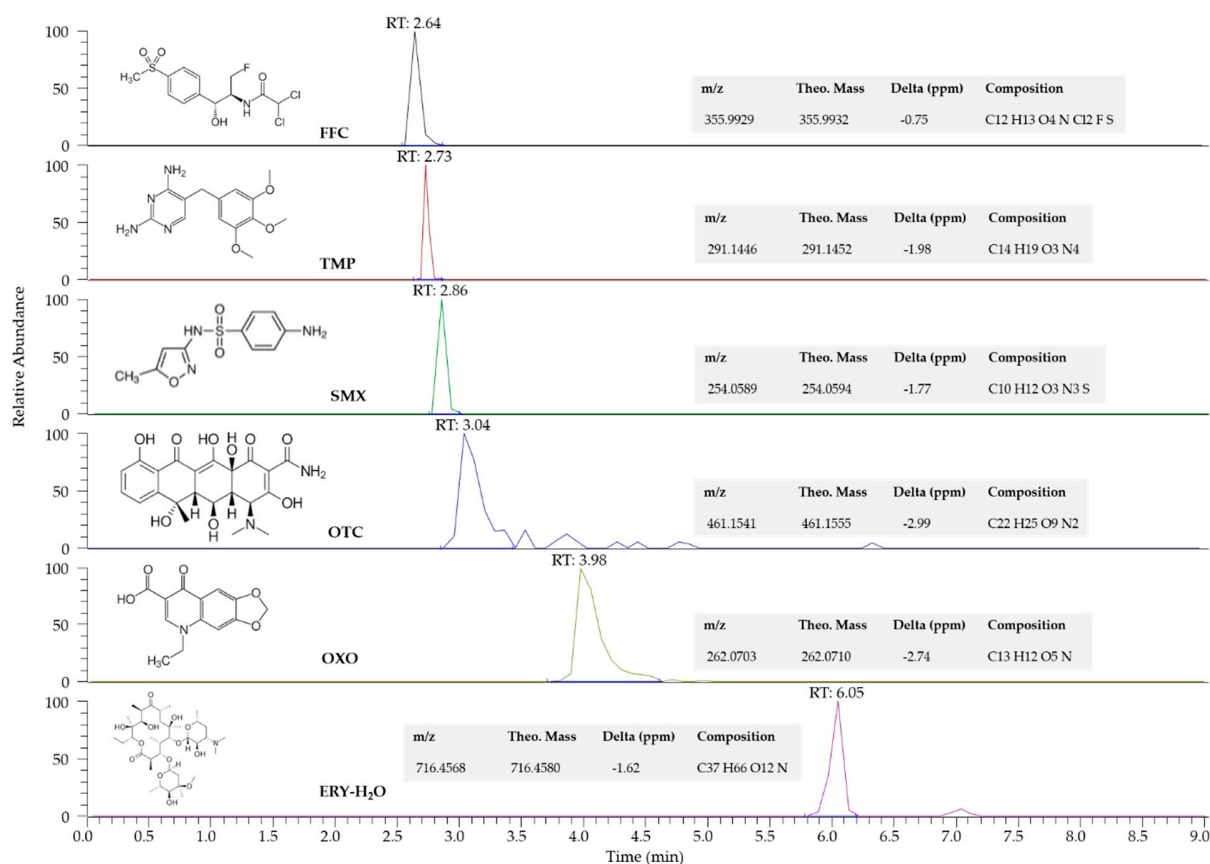

**Figure S3.** SIM-LC-LTQ/Orbitrap MS chromatogram of the selected antibiotics matrix-matched solution at concentration 25 µg L<sup>-1</sup>. Peaks are: (a) florfenicol (FFC), (b) trimethoprim (TMP), (c) sulfamethoxazole (SMX), (d) oxytetracycline (OTC), (e) oxolinic acid (OXO), (f) erythromycin-H<sub>2</sub>O (ERY-H<sub>2</sub>O)

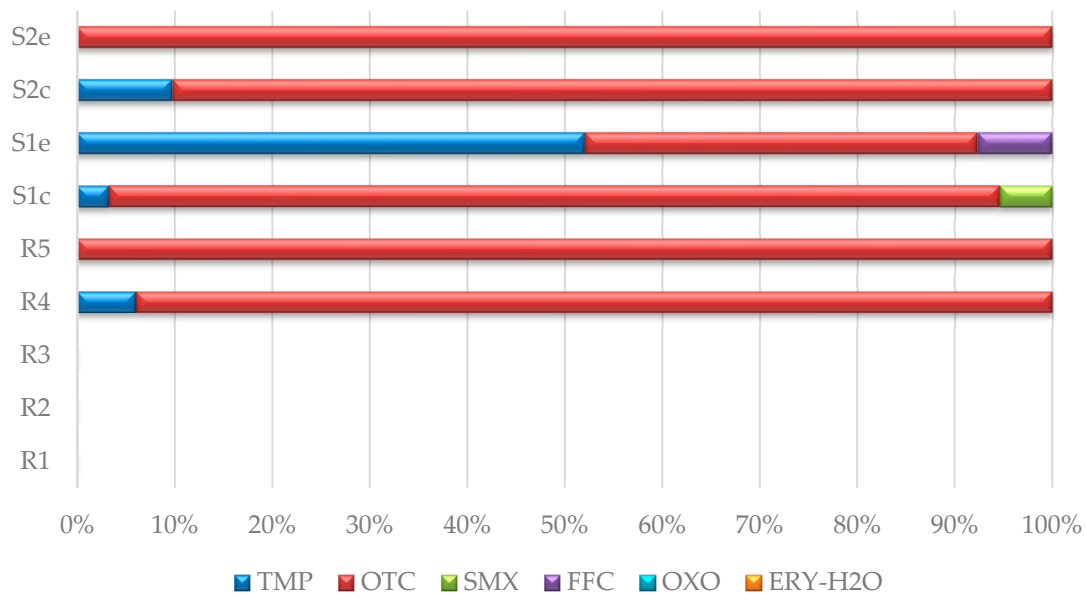

**Figure S4.** The selected antibiotics' concentration levels expressed as percent (%) occurrence detected in each sampling point (R1-5 and S1-2 exit and center) of surface waters impacted by aquaculture facilities.



## REFERENCES TO THE TABLES S1, S7 AND S8

- Akiyama, K., Hirazawa, N., & Hatanaka, A. (2020). Coadministration of citric acid allows oxytetracycline dose reduction in yellowtail *Seriola quinqueradiata* infected with *Vibrio anguillarum*. *Diseases of Aquatic Organisms*, 140, 25–29. <https://doi.org/10.3354/DAO03485>
- Ando, T., Nagase, H., Eguchi, K., Hirooka, T., Nakamura, T., Miyamoto, K., & Hirata, K. (2007). A novel method using cyanobacteria for ecotoxicity test of veterinary antimicrobial agents. *Environmental Toxicology and Chemistry*, 26(4), 601–606. <https://doi.org/10.1897/06-195R.1>
- Białk-Bielińska, A., Stolte, S., Arning, J., Uebers, U., Bösch, A., Stepnowski, P., & Matzke, M. (2011). Ecotoxicity evaluation of selected sulfonamides. *Chemosphere*, 85(6), 928–933. <https://doi.org/10.1016/J.CHEMOSPHERE.2011.06.058>
- Borecka, M., Białk-Bielińska, A., Haliński, Ł. P., Pazdro, K., Stepnowski, P., & Stolte, S. (2016). The influence of salinity on the toxicity of selected sulfonamides and trimethoprim towards the green algae *Chlorella vulgaris*. *Journal of Hazardous Materials*, 308, 179–186. <https://doi.org/10.1016/J.JHAZMAT.2016.01.041>
- Carraschi, S. P., Shiogiri, N. S., Venturini, F. P., Cruz, C. da, Girio, A. C. F., & Neto, J. G. M. (2011). Acute toxicity and environmental risk of oxytetracycline and florfenicol antibiotics to pacu (*Piaractus mesopotamicus*). *Boletim Do Instituto de Pesca*, 37(2), 115–122.
- Carvalho, I. T., & Santos, L. (2016). Antibiotics in the aquatic environments: A review of the European scenario. *Environment International*, 94, 736–757. <https://doi.org/10.1016/J.ENVINT.2016.06.025>
- De Liguoro, M., Di Leva, V., Dalla Bona, M., Merlanti, R., Caporale, G., & Radaelli, G. (2012). Sublethal effects of trimethoprim on four freshwater organisms. *Ecotoxicology and Environmental Safety*, 82, 114–121. <https://doi.org/10.1016/J.ECOENV.2012.05.016>
- Di Salvo, A., della Rocca, G., Cagnardi, P., & Pellegrino, R. M. (2013). Pharmacokinetics and residue depletion of erythromycin in rainbow trout *Oncorhynchus mykiss* (Walbaum). *Journal of Fish Diseases*, 36(12), 1021–1029. <https://doi.org/10.1111/JFD.12074>
- Eguchi, K., Nagase, H., Ozawa, M., Endoh, Y. S., Goto, K., Hirata, K., Miyamoto, K., & Yoshimura, H. (2004). Evaluation of antimicrobial agents for veterinary use in the ecotoxicity test using microalgae. *Chemosphere*, 57(11), 1733–1738. <https://doi.org/10.1016/J.CHEMOSPHERE.2004.07.017>
- Ferrari, B., Mons, R., Vollat, B., Fraysse, B., Paxéus, N., Lo Giudice, R., Pollio, A., & Garric, J. (2004). Environmental risk assessment of six human pharmaceuticals: are the current environmental risk assessment procedures sufficient for the protection of the aquatic environment? *Environmental Toxicology and Chemistry*, 23(5), 1344–1354. <https://doi.org/10.1897/03-246>
- Ferreira, C. S. G., Nunes, B. A., Henriques-Almeida, J. M. de M., & Guilhermino, L. (2007). Acute toxicity of oxytetracycline and florfenicol to the microalgae *Tetraselmis chuii* and to the crustacean *Artemia parthenogenetica*. *Ecotoxicology and Environmental Safety*, 67(3), 452–458. <https://doi.org/10.1016/J.ECOENV.2006.10.006>
- Freitas, E. C., Rocha, O., & Espíndola, E. L. G. (2018). Effects of florfenicol and oxytetracycline on the tropical cladoceran *Ceriodaphnia silvestrii*: A mixture toxicity approach to predict the potential risks of antimicrobials for zooplankton. *Ecotoxicology and Environmental Safety*, 162, 663–672. <https://doi.org/10.1016/j.ecoenv.2018.06.073>
- Ginebreda, A., Muñoz, I., de Alda, M. L., Brix, R., López-Doval, J., & Barceló, D. (2010). Environmental risk assessment of pharmaceuticals in rivers: relationships between hazard indexes and aquatic macroinvertebrate diversity indexes in the Llobregat River (NE Spain). *Environment International*, 36(2), 153–162. <https://doi.org/10.1016/J.ENVINT.2009.10.003>
- Gros, M., Petrović, M., Ginebreda, A., & Barceló, D. (2010). Removal of pharmaceuticals during wastewater treatment and environmental risk assessment using hazard indexes. *Environment International*, 36(1), 15–26. <https://doi.org/10.1016/J.ENVINT.2009.09.002>
- Grung, M., Källqvist, T., Sakshaug, S., Skurtveit, S., & Thomas, K. V. (2008). Environmental assessment of Norwegian priority pharmaceuticals based on the EMEA guideline. *Ecotoxicology and Environmental*

- Safety*, 71(2), 328–340. <https://doi.org/10.1016/J.ECOENV.2007.10.015>
- Isidori, M., Lavorgna, M., Nardelli, A., Pascarella, L., & Parrella, A. (2005). Toxic and genotoxic evaluation of six antibiotics on non-target organisms. *The Science of the Total Environment*, 346(1–3), 87–98. <https://doi.org/10.1016/J.SCITOTENV.2004.11.017>
- Ji, K., Kim, S., Han, S., Seo, J., Lee, S., Park, Y., Choi, K., Kho, Y. L., Kim, P. G., Park, J., & Choi, K. (2012). Risk assessment of chlortetracycline, oxytetracycline, sulfamethazine, sulfathiazole, and erythromycin in aquatic environment: Are the current environmental concentrations safe? *Ecotoxicology*, 21(7), 2031–2050. <https://doi.org/10.1007/S10646-012-0956-6/TABLES/5>
- Kim, Y., Choi, K., Jung, J., Park, S., Kim, P. G., & Park, J. (2007). Aquatic toxicity of acetaminophen, carbamazepine, cimetidine, diltiazem and six major sulfonamides, and their potential ecological risks in Korea. *Environment International*, 33(3), 370–375. <https://doi.org/10.1016/J.ENVINT.2006.11.017>
- Kolar, B., Arnuš, L., Jeretin, B., Gutmaher, A., Drobne, D., & Durjava, M. K. (2014). The toxic effect of oxytetracycline and trimethoprim in the aquatic environment. *Chemosphere*, 115(1), 75–80. <https://doi.org/10.1016/J.CHEMOSPHERE.2014.02.049>
- Kołodziejska, M., Maszkowska, J., Białk-Bielińska, A., Steudte, S., Kumirska, J., Stepnowski, P., & Stolte, S. (2013). Aquatic toxicity of four veterinary drugs commonly applied in fish farming and animal husbandry. *Chemosphere*, 92(9), 1253–1259. <https://doi.org/10.1016/J.CHEMOSPHERE.2013.04.057>
- Kovalakova, P., Cizmas, L., McDonald, T. J., Marsalek, B., Feng, M., & Sharma, V. K. (2020). Occurrence and toxicity of antibiotics in the aquatic environment: A review. *Chemosphere*, 251, 126351. <https://doi.org/10.1016/J.CHEMOSPHERE.2020.126351>
- Li, L., Liu, D., Zhang, Q., Song, K., Zhou, X., Tang, Z., & Zhou, X. (2019). Occurrence and ecological risk assessment of selected antibiotics in the freshwater lakes along the middle and lower reaches of Yangtze River Basin. *Journal of Environmental Management*, 249. <https://doi.org/10.1016/J.JENVMAN.2019.109396>
- Li, Q., Cheng, B., Liu, S., Zhang, Y., Zhou, L., & Guo, J. (2020). Assessment of the Risks of the Major Use Antibiotics in China's Surface Waters Using a Probabilistic Approach. *Integrated Environmental Assessment and Management*, 16(1), 43–52. <https://doi.org/10.1002/IEAM.4204>
- Li, W., Shi, Y., Gao, L., Liu, J., & Cai, Y. (2012). Occurrence of antibiotics in water, sediments, aquatic plants, and animals from Baiyangdian Lake in North China. *Chemosphere*, 89(11), 1307–1315. <https://doi.org/10.1016/J.CHEMOSPHERE.2012.05.079>
- Lu, G., Li Zhihua, & Jianchao Liu. (2013). Effects of selected pharmaceuticals on growth, reproduction and feeding of *Daphnia Magna*. *Fresenius Environmental Bulletin*, 22.
- Magdaleno, A., Carusso, S., & Moretton, J. (2017). Toxicity and Genotoxicity of Three Antimicrobials Commonly Used in Veterinary Medicine. *Bulletin of Environmental Contamination and Toxicology*, 99(3), 315–320. <https://doi.org/10.1007/S00128-017-2091-9>
- Martins, A., Guimarães, L., & Guilhermino, L. (2013). Chronic toxicity of the veterinary antibiotic florfenicol to *Daphnia magna* assessed at two temperatures. *Environmental Toxicology and Pharmacology*, 36(3), 1022–1032. <https://doi.org/10.1016/j.etap.2013.09.001>
- Mattioli, C. C., Chiste, B. M., Takeshita, N. A., Jonsson, C. M., Ferracini, V. L., & Hisano, H. (2020). Acute Toxicity and Risk Assessment of Florfenicol for Nile Tilapia Larvae. *Bulletin of Environmental Contamination and Toxicology*, 105(5), 721–727. <https://doi.org/10.1007/S00128-020-03013-6/TABLES/4>
- Nie, X.-P., Liu, B.-Y., Yu, H.-J., Liu, W.-Q., & Yang, Y.-F. (2013). Toxic effects of erythromycin, ciprofloxacin and sulfamethoxazole exposure to the antioxidant system in *Pseudokirchneriella subcapitata*. *Environmental Pollution*, 172, 23–32. <https://doi.org/10.1016/j.envpol.2012.08.013>
- Oliveira, R., McDonough, S., Ladewig, J. C. L., Soares, A. M. V. M., Nogueira, A. J. A., & Domingues, I. (2013). Effects of oxytetracycline and amoxicillin on development and biomarkers activities of zebrafish (*Danio rerio*). *Environmental Toxicology and Pharmacology*, 36(3), 903–912. <https://doi.org/10.1016/J.ETAP.2013.07.019>
- Osorio, V., Sanchís, J., Abad, J. L., Ginebreda, A., Farré, M., Pérez, S., & Barceló, D. (2016). Investigating

- the formation and toxicity of nitrogen transformation products of diclofenac and sulfamethoxazole in wastewater treatment plants. *Journal of Hazardous Materials*, 309, 157–164. <https://doi.org/10.1016/J.JHAZMAT.2016.02.013>
- Park, S., & Choi, K. (2008). Hazard assessment of commonly used agricultural antibiotics on aquatic ecosystems. *Ecotoxicology (London, England)*, 17(6), 526–538. <https://doi.org/10.1007/S10646-008-0209-X>
- Phu, T. M., Scippo, M. L., Phuong, N. T., Tien, C. T. K., Son, C. H., & Dalsgaard, A. (2015). Withdrawal time for sulfamethoxazole and trimethoprim following treatment of striped catfish (*Pangasianodon hypophthalmus*) and hybrid red tilapia (*Oreochromis mossambicus* × *Oreochromis niloticus*). *Aquaculture*, 437, 256–262. <https://doi.org/10.1016/J.AQUACULTURE.2014.12.009>
- Pro, J., Ortiz, J. A., Boleas, S., Ferná Ndez, C., Carbonell, G., & Tarazona, J. V. (2003). Effect Assessment of Antimicrobial Pharmaceuticals on the Aquatic Plant *Lemna minor* Environmental Contamination and Toxicology 290. *J. Pro Bull. Environ. Contam. Toxicol*, 70, 290–295. <https://doi.org/10.1007/s00128-002-0208-1>
- Quinn, B., Gagné, F., & Blaise, C. (2008). An investigation into the acute and chronic toxicity of eleven pharmaceuticals (and their solvents) found in wastewater effluent on the cnidarian, *Hydra attenuata*. *Science of The Total Environment*, 389(2–3), 306–314. <https://doi.org/10.1016/J.SCITOTENV.2007.08.038>
- Staveley, J. P., Gaikowski, M., Meinertz, J., Endris, R., & Scheef, G. (2013). Environmental Assessment for Aquaflor (Florfenicol) 50% Type A Medicated Article Fed at a Dose up to 15 mg florfenicol/kg body weight/day for Control of Mortality Associated with Bacterial Diseases in Freshwater-Reared Finfish in Recirculating Aquaculture Systems. *Environmental Assessment*.
- Straub, J. O., Hoffmann, F., & Roche, L. (2016). Aquatic environmental risk assessment for human use of the old antibiotic sulfamethoxazole in Europe. *Environmental Toxicology and Chemistry*, 35(4), 767–779. <https://doi.org/10.1002/ETC.2945>
- Touraki, M., Niopas, I., & Karagiannis, V. (2012). Treatment of vibriosis in European sea bass larvae, *Dicentrarchus labrax* L., with oxolinic acid administered by bath or through medicated nauplii of *Artemia franciscana* (Kellogg): efficacy and residual kinetics. *Journal of Fish Diseases*, 35(7), 513–522. <https://doi.org/10.1111/J.1365-2761.2012.01387.X>
- Valcárcel, Y., González Alonso, S., Rodríguez-Gil, J. L., Gil, A., & Catalá, M. (2011). Detection of pharmaceutically active compounds in the rivers and tap water of the Madrid Region (Spain) and potential ecotoxicological risk. *Chemosphere*, 84(10), 1336–1348. <https://doi.org/10.1016/J.CHEMOSPHERE.2011.05.014>
- Wang, X., Lin, Y., Zheng, Y., & Meng, F. (2022). Antibiotics in mariculture systems: A review of occurrence, environmental behavior, and ecological effects. *Environmental Pollution*, 293, 118541. <https://doi.org/10.1016/J.ENVPOL.2021.118541>
- Wang, Z., Wang, S., & Peijnenburg, W. J. G. M. (2016). Prediction of joint algal toxicity of nano-CeO<sub>2</sub>/nano-TiO<sub>2</sub> and florfenicol: Independent action surpasses concentration addition. *Chemosphere*, 156, 8–13. <https://doi.org/10.1016/J.CHEMOSPHERE.2016.04.072>
- Wollenberger, L., Halling-Sørensen, B., & Kusk, K. O. (2000). Acute and chronic toxicity of veterinary antibiotics to *Daphnia magna*. *Chemosphere*, 40(7), 723–730. [https://doi.org/10.1016/S0045-6535\(99\)00443-9](https://doi.org/10.1016/S0045-6535(99)00443-9)
- Yazdanbakhsh, A., Eslami, A., Massoudinejad, M., & Avazpour, M. (2020). Enhanced degradation of sulfamethoxazole antibiotic from aqueous solution using Mn-WO<sub>3</sub>/LED photocatalytic process: Kinetic, mechanism, degradation pathway and toxicity reduction. *Chemical Engineering Journal*, 380, 122497. <https://doi.org/10.1016/j.cej.2019.122497>
- Zeng, Q., Liao, C., Terhune, J., & Wang, L. (2019). Impacts of florfenicol on the microbiota landscape and resistome as revealed by metagenomic analysis. *Microbiome*, 7(1), 1–13. <https://doi.org/10.1186/S40168-019-0773-8/FIGURES/5>
